# Supplementary material
Source: Elsevier journal article supplement (https://www.sciencedirect.com/science/article/pii/S0213911118301778)
Supplement: mmc1 [file S0213911118301778:mmc1.docx]

Table I shows the changes in the level of EQ-5D-5L for each dimension between groups. The proportion of women reporting moderate or severe problems (level 3 or 4) reduced in both groups at 16 weeks in all dimentions. The proportion with no problems (level 1) increased in both groups in all dimensions except in usual activites in the control group. Patients improved more in the intervention group than in the control group in all dimensions but the differences were not statistically significant.

| **Table I.**  Disaggregated responses by each domain in EuroQol-5D-5L. | | | | | | | |  |
| --- | --- | --- | --- | --- | --- | --- | --- | --- |
|  |  | **At baseline** | | **At 8 weeks** | | **At 16 weeks** | | **pa** |
|  |  | **Control** | **Intervention** | **Control** | **Intervention** | **Control** | **Intervention** |
| Mobility (%) | Answered | 97.37 | 100.00 | 68.42 | 72.97 | 73.68 | 87.84 |  |
| Missing | 2.63 | 0.00 | 31.58 | 27.03 | 26.32 | 12.16 |
| 1 | 66.22 | 81.08 | 78.85 | 85.19 | 69.64 | 87.69 | 0.3 |
| 2 | 29.73 | 14.86 | 17.31 | 12.96 | 26.79 | 12.31 |
| 3 | 4.05 | 4.05 | 3.85 | 1.85 | 3.57 |  |
| 4 |  |  |  |  |  |  |
| 5 |  |  |  |  |  |  |
| Self-care (%) | Answered | 97.37 | 100.00 | 68.42 | 72.97 | 73.68 | 87.84 |  |
| Missing | 2.63 | 0.00 | 31.58 | 27.03 | 26.32 | 12.16 |
| 1 | 91.89 | 95.95 | 96.00 | 98.15 | 94.64 | 98.46 | 0.8 |
| 2 | 6.76 | 2.7 | 2.00 | 1.85 | 5.36 | 1.54 |
| 3 | 1.35 | 1.35 | 2.00 |  |  |  |
| 4 |  |  |  |  |  |  |
| 5 |  |  |  |  |  |  |
| Usual activities (%) | Answered | 97.37 | 100.00 | 68.42 | 72.97 | 73.68 | 87.84 |  |
| Missing | 2.63 | 0.00 | 31.58 | 27.03 | 26.32 | 12.16 |
| 1 | 79.73 | 83.78 | 82.35 | 90.74 | 75.00 | 89.23 | 0.17 |
| 2 | 14.86 | 12.16 | 11.76 | 5.56 | 21.43 | 9.23 |
| 3 | 5.41 | 4.05 | 5.88 | 1.85 | 3.57 | 1.54 |
| 4 |  |  |  | 1.85 |  |  |
| 5 |  |  |  |  |  |  |
| Pain/discomfort (%) | Answered | 97.37 | 100.00 | 68.42 | 72.97 | 73.68 | 87.84 |  |
| Missing | 2.63 | 0.00 | 31.58 | 27.03 | 26.32 | 12.16 |
| 1 | 32.43 | 27.03 | 32.69 | 31.48 | 42.86 | 40.00 | 0.53 |
| 2 | 44.59 | 45.95 | 42.31 | 50.00 | 48.21 | 46.15 |
| 3 | 20.27 | 25.68 | 17.31 | 16.67 | 7.14 | 13.85 |
| 4 | 2.7 | 1.35 | 7.69 | 1.85 | 1.79 |  |
| 5 |  |  |  |  |  |  |
| Anxiety/depression (%) | Answered | 97.37 | 100.00 | 68.42 | 72.97 | 73.68 | 87.84 |  |
| Missing | 2.63 | 0.00 | 31.58 | 27.03 | 26.32 | 12.16 |
| 1 | 45.95 | 41.89 | 65.38 | 53.7 | 58.93 | 60.00 | 0.49 |
| 2 | 40.54 | 39.19 | 25.00 | 31.48 | 35.71 | 30.77 |
| 3 | 9.46 | 16.22 | 7.69 | 11.11 | 3.57 | 7.69 |
| 4 | 4.05 | 2.7 | 1.92 | 3.70 | 1.79 | 1.54 |
| 5 |  |  |  |  |  |  |
| The EQ-5D questionnaire has five health-related domains, each with five levels, where level one represents the best possible health and level five the worst.  aRefers to ordered logistic model and compares differences between groups at 16 weeks of follow-up. | | | | | | | | |
|
