# Supplementary material
Source: Elsevier journal article supplement (https://www.sciencedirect.com/science/article/pii/S0213911118301778)
Supplement: mmc2 [file S0213911118301778:mmc2.docx]

| **Table II**  **The EuroQol-5D-5L scores of the exercise intervention program. Intervention and control groups.** | | | | | | | | | |
| --- | --- | --- | --- | --- | --- | --- | --- | --- | --- |
| **Alternatives** | **Group** | **Number with missing baseline data** | **EQ-5D-5L baseline** | **Number with missing data at 8 weeks** | **EQ-5D-5L at 8 weeks** | **Number with missing data at 16 weeks** | **EQ-5D-5L at 16 weeks** | **Difference in difference (p)** |  |
|  |
|  |
|  |
| Without multiple imputation | Control | 0 | 0.839 | 24 | 0.863 | 20 | 0.867 | 0.014 (0.63) |  |
|  | Intervention | 2 | 0.854 | 18 | 0.872 | 9 | 0.897 |  |
| With multiple imputation | Control | 0 | 0.839 | 0 | 0.870 | 0 | 0.852 | 0.026 (0.17) |  |
|  | Intervention | 0 | 0.854 | 0 | 0.875 | 0 | 0.893 |  |
| EQ-5D-5L: EuroQol-5D-5L.  Difference in difference refers to the difference in EQ-5D-5L scores between groups measured at 16 weeks and at baseline adjusted for EQ-5D-5L differences between groups at baseline.  p corresponds to mixed-effect model. | | | | | | | | |  |
|  |
